# Supplementary material for: Plasma adiponectin levels and type 2 diabetes risk: a nested case-control study in a Chinese population and an updated meta-analysis
Source: PubMed Central journal article supplement (PMC5762808; doi:10.1038/s41598-017-18709-9), 2018-01-10
Supplement: 41598_2017_18709_MOESM1_ESM.pdf [file 41598_2017_18709_MOESM1_ESM.pdf]

**Plasma adiponectin levels and type 2 diabetes risk: a nested case-control study in a Chinese population and an updated meta-analysis**

Yeli Wang, Rui-Wei Meng, Setor K. Kunutsor, Rajiv Chowdhury, Jian-Min Yuan, Woon-Puay Koh, An Pan

**Online Supplemental Material**

The following materials are included in the Online Supplemental Material.

1. Search strategies in PubMed
2. Supplemental Tables S1-S6
3. Supplemental Figures S1-S2

**Supplemental Table S1.** Pearson correlation coefficients between adiponectin and age, body mass index, levels of lipids, high-sensitivity C-reactive protein, random glucose and insulin in control participants, the Singapore Chinese Health Study

**Supplemental Table S2.** Odds ratio (95% confidence interval) for risk of type 2 diabetes according to tertiles of adiponectin, stratified by body mass index, physical activity, smoking, and high-sensitivity C-reactive protein levels, using unconditional logistic regression model, the Singapore Chinese Health Study

**Supplemental Table S3.** Summary statistics to assess adiponectin in predicting type 2 diabetes, the Singapore Chinese Health Study

**Supplemental Table S4.** Reclassification of type 2 diabetes cases and controls with no risk categories based on their plasma concentrations of adiponectin, the Singapore Chinese Health Study

**Supplemental Table S5.** Stratified analyses of adiponectin concentrations and risk of type 2 diabetes

**Supplemental Table S6.** The extracted data for the dose-response meta-analysis from 12 available studies

**Supplemental Figure S1.** Flowchart of the Singapore Chinese Health Study

**Supplemental Figure S2.** Flowchart of the meta-analysis

**Search strategies in PubMed** (September 10, 2016)

adiponectin [MeSH] OR adiponectin OR ADIPOQ OR ADPN) AND (diabetes mellitus [MeSH] OR diabetes OR diabetic OR diabetics)

Restricted to “human study”, and the time period was between April 10, 2009 to September 10, 2016.

**Supplemental Table S1.** Pearson correlation coefficients between adiponectin and age, body mass index, levels of lipids, high-sensitivity C-reactive protein, random glucose and insulin in control participants, the Singapore Chinese Health Study

| Marker               | Adiponectin        | Age                | BMI                | TC                | HDL-C              | TG                | Ratio of TG to HDL-C | Hs-CRP            | Random glucose    | Random insulin |
|----------------------|--------------------|--------------------|--------------------|-------------------|--------------------|-------------------|----------------------|-------------------|-------------------|----------------|
| Adiponectin          | 1.00               |                    |                    |                   |                    |                   |                      |                   |                   |                |
| Age                  | 0.11 <sup>a</sup>  | 1.00               |                    |                   |                    |                   |                      |                   |                   |                |
| BMI                  | -0.15 <sup>a</sup> | -0.01              | 1.00               |                   |                    |                   |                      |                   |                   |                |
| TC                   | 0.04               | -0.02              | -0.02              | 1.00              |                    |                   |                      |                   |                   |                |
| HDL-C                | 0.49 <sup>a</sup>  | -0.09 <sup>a</sup> | -0.18 <sup>a</sup> | 0.29 <sup>a</sup> | 1.00               |                   |                      |                   |                   |                |
| TG                   | -0.43 <sup>a</sup> | 0.05               | 0.16 <sup>a</sup>  | 0.13 <sup>a</sup> | -0.54 <sup>a</sup> | 1.00              |                      |                   |                   |                |
| Ratio of TG to HDL-C | -0.50 <sup>a</sup> | 0.07               | 0.19 <sup>a</sup>  | -0.01             | -0.78 <sup>a</sup> | 0.95 <sup>a</sup> | 1.00                 |                   |                   |                |
| Hs-CRP               | -0.19 <sup>a</sup> | 0.06               | 0.26 <sup>a</sup>  | 0.05 <sup>a</sup> | -0.14 <sup>a</sup> | 0.11 <sup>a</sup> | 0.14 <sup>a</sup>    | 1.00              |                   |                |
| Random glucose       | -0.01              | 0.08               | 0.03               | -0.07             | -0.06              | 0.06              | 0.07                 | 0.04              | 1.00              |                |
| Random insulin       | -0.20 <sup>a</sup> | 0.04               | 0.23 <sup>a</sup>  | -0.03             | -0.29 <sup>a</sup> | 0.35 <sup>a</sup> | 0.36 <sup>a</sup>    | 0.15 <sup>a</sup> | 0.66 <sup>a</sup> | 1.00           |

**Abbreviations:** BMI, body mass index; TC, total cholesterol; HDL-C, HDL cholesterol; TG, triglycerides; hs-CRP, high-sensitivity C-reactive protein.

<sup>a</sup>Correlation coefficients are statistically significant at  $P < 0.05$ .

**Supplemental Table S2.** Odds ratio (95% confidence interval) for risk of type 2 diabetes according to tertiles of adiponectin, stratified by body mass index, physical activity, smoking, and high-sensitivity C-reactive protein levels, using unconditional logistic regression model, the Singapore Chinese Health Study<sup>a</sup>

| Variables                                                     | Tertiles of adiponectin concentration |                  |                  | <i>P</i> for trend <sup>b</sup> | <i>P</i> for interaction <sup>c</sup> |
|---------------------------------------------------------------|---------------------------------------|------------------|------------------|---------------------------------|---------------------------------------|
|                                                               | T1                                    | T2               | T3               |                                 |                                       |
| <b>Gender</b>                                                 |                                       |                  |                  |                                 |                                       |
| Male                                                          | 1.00                                  | 0.71 (0.38-1.31) | 0.48 (0.18-1.25) | 0.097                           | 0.26                                  |
| Female                                                        | 1.00                                  | 0.67 (0.33-1.35) | 0.21 (0.08-0.51) | 0.001                           |                                       |
| <b>Body mass index</b>                                        |                                       |                  |                  |                                 |                                       |
| <23.0 kg/m <sup>2</sup>                                       | 1.00                                  | 1.09 (0.62-1.93) | 0.59 (0.29-1.21) | 0.21                            | 0.041                                 |
| ≥23.0 kg/m <sup>2</sup>                                       | 1.00                                  | 0.76 (0.47-1.22) | 0.36 (0.19-0.69) | 0.003                           |                                       |
| <b>Physical activity</b>                                      |                                       |                  |                  |                                 |                                       |
| <0.5 hour/week                                                | 1.00                                  | 0.96 (0.64-1.43) | 0.54 (0.23-0.54) | 0.042                           | 0.10                                  |
| ≥0.5 hour/week                                                | 1.00                                  | 0.61 (0.28-1.36) | 0.21 (0.07-0.68) | 0.01                            |                                       |
| <b>Smoking</b>                                                |                                       |                  |                  |                                 |                                       |
| Never                                                         | 1.00                                  | 0.84 (0.55-1.29) | 0.49 (0.29-0.83) | 0.011                           | 0.27                                  |
| Ever                                                          | 1.00                                  | 0.93 (0.46-1.86) | 0.28 (0.09-0.85) | 0.07                            |                                       |
| <b>High-sensitivity C-reactive protein levels<sup>d</sup></b> |                                       |                  |                  |                                 |                                       |
| ≤1.2 mg/L                                                     | 1.00                                  | 0.85 (0.48-1.53) | 0.58 (0.29-1.15) | 0.13                            | 0.64                                  |
| >1.2 mg/L                                                     | 1.00                                  | 0.87 (0.55-1.39) | 0.34 (0.18-0.65) | 0.004                           |                                       |

<sup>a</sup>Model was adjusted for age at blood taken (continuous), gender (male, female), dialect group (Cantonese, Hokkien), smoking (never, ever smoker), alcohol intake (never, ever drinker), weekly activity (<0.5, ≥0.5 hours/week), education level (primary school and below, secondary or above), history of hypertension (yes, no), fasting status (yes, no), body mass index (continuous), high-sensitivity C-reactive protein (mmol/L), the ratio of triglycerides to HDL cholesterol, random glucose (mmol/L) and random insulin (mIU/L) (all in tertiles) except for the respective stratification variable.

<sup>b</sup>Linear trend was tested by using the median level of each tertile of adiponectin level.

<sup>c</sup>Interaction was tested between stratified variable (dichotomized) and adiponectin (per log increment) in the models.

<sup>d</sup>Median cutoff for high-sensitivity C-reactive protein was calculated among controls and defined as 1.2 mg/L.

**Supplemental Table S3.** Summary statistics to assess adiponectin in predicting type 2 diabetes, the Singapore Chinese Health Study

| Variable                                | Multivariable model              |                      |     |      |
|-----------------------------------------|----------------------------------|----------------------|-----|------|
|                                         | Discrimination<br>(AUC [95% CI]) | Calibration<br>(AIC) | NRI | IDI  |
| Base model 1 <sup>a</sup>               | 0.74 (0.71-0.77)                 | 595                  |     |      |
| Base model 1 <sup>a</sup> + adiponectin | 0.76 (0.73-0.79) <sup>d</sup>    | 566                  | 33% | 0.03 |
| Base model 2 <sup>b</sup>               | 0.82 (0.80-0.85)                 | 389                  |     |      |
| Base model 2 <sup>b</sup> + adiponectin | 0.83 (0.80-0.85)                 | 376                  | 19% | 0.01 |
| Base model 3 <sup>c</sup>               | 0.87 (0.84-0.89)                 | 329                  |     |      |
| Base model 3 <sup>c</sup> + adiponectin | 0.87 (0.85-0.89)                 | 325                  | 12% | 0.01 |

**Abbreviations:** AUC, area under the receiver operating characteristic curve; CI, confidence interval; AIC, Akaike information criterion; NRI, net reclassification improvement; IDI, integrated discrimination improvement.

<sup>a</sup>Base model 1 included education level (no, primary school, secondary and above), weekly moderate-to-vigorous activity (<0.5, 0.5-3.9 hours/week, ≥4 hours/week), history of hypertension (yes, no), body mass index (continuous), and tertiles of triglycerides, HDL cholesterol and high-sensitivity C-reactive protein.

<sup>b</sup>Base model 2 included variables in base model 1 plus tertiles of random glucose and random insulin.

<sup>c</sup>Base model 3 included variables in base model 1 plus tertiles of HbA1c and random insulin.

<sup>d</sup>Compared with the base model, the increment in AUC value was statistically significant ( $P < 0.05$ ).

**Supplemental Table S4.** Reclassification of type 2 diabetes cases and controls with no risk categories based on their plasma concentrations of adiponectin, the Singapore Chinese Health Study

| Base model 1 <sup>a</sup> + adiponectin   | All | Assigned to higher diabetes risk | Assigned to lower diabetes risk | NRI                          |                      |
|-------------------------------------------|-----|----------------------------------|---------------------------------|------------------------------|----------------------|
| Expected number of event participants     | 571 | 352                              | 219                             | Among event participants     | 23.3%                |
| Expected number of non-event participants | 571 | 257                              | 314                             | Among non-event participants | 10.0%                |
|                                           |     |                                  |                                 | Overall original (95% CI)    | 33.3% (21.7%, 44.9%) |
| Base model 2 <sup>b</sup> + adiponectin   | All | Assigned to higher diabetes risk | Assigned to lower diabetes risk | NRI                          |                      |
| Expected number of event participants     | 571 | 334                              | 237                             | Among event participants     | 17.1%                |
| Expected number of non-event participants | 571 | 280                              | 291                             | Among non-event participants | 2.0%                 |
|                                           |     |                                  |                                 | Overall original (95% CI)    | 19.1% (6.8%, 31.4%)  |
| Base model 3 <sup>c</sup> + adiponectin   | All | Assigned to higher diabetes risk | Assigned to lower diabetes risk | NRI                          |                      |
| Expected number of event participants     | 571 | 319                              | 252                             | Among event participants     | 18.7%                |
| Expected number of non-event participants | 571 | 284                              | 287                             | Among non-event participants | 11.1%                |
|                                           |     |                                  |                                 | Overall original (95% CI)    | 12.3% (0%, 24.6%)    |



**Abbreviations:** NRI: net reclassification improvement.

<sup>a</sup>Base model 1 included education level (no, primary school, secondary and above), weekly moderate-to-vigorous activity (<0.5, 0.5-3.9 hours/week,  $\geq 4$  hours/week), history of hypertension (yes, no), body mass index (continuous), and tertiles of triglycerides, HDL cholesterol and high-sensitivity C-reactive protein.

<sup>b</sup>Base model 2 included variables in base model 1 plus tertiles of random glucose and random insulin.

<sup>c</sup>Base model 3 included variables in base model 1 plus tertiles of HbA1c and random insulin.

**Supplemental Table S5.** Stratified analyses of adiponectin concentrations and risk of type 2 diabetes

|                                   | Risk of type 2 diabetes |                                 |                           |                            |
|-----------------------------------|-------------------------|---------------------------------|---------------------------|----------------------------|
|                                   | RR (95% CI)             | <i>n</i> of prospective studies | <i>I</i> <sup>2</sup> (%) | <i>P</i> for Heterogeneity |
| Overall results                   | 0.54 (0.47-0.61)        | 34                              | 48.8                      | 0.001                      |
| Trim and fill method              | 0.63 (0.50-0.76)        | 34                              | 64.0                      | 0.001                      |
| Sex                               |                         |                                 |                           |                            |
| Men                               | 0.67 (0.50-0.90)        | 4                               | 0                         | 0.60                       |
| Women                             | 0.32 (0.20-0.52)        | 2                               | 0                         | 0.47                       |
| Mixed                             | 0.53 (0.45-0.62)        | 28                              | 53.6                      | 0.001                      |
| Study Location                    |                         |                                 |                           |                            |
| US                                | 0.62 (0.49-0.79)        | 9                               | 40.5                      | 0.10                       |
| Europe or Oceania                 | 0.50 (0.43-0.58)        | 18                              | 29.6                      | 0.12                       |
| Asia                              | 0.48 (0.32-0.73)        | 7                               | 69.4                      | 0.003                      |
| Ethnicity                         |                         |                                 |                           |                            |
| Caucasian Whites                  | 0.49 (0.43-0.57)        | 19                              | 25.6                      | 0.15                       |
| East Asians                       | 0.51 (0.36-0.73)        | 8                               | 64.3                      | 0.01                       |
| Others, mixed                     | 0.64 (0.48-0.85)        | 7                               | 51.0                      | 0.06                       |
| Mean age groups                   |                         |                                 |                           |                            |
| <60 years                         | 0.53 (0.45-0.61)        | 24                              | 49.8                      | 0.003                      |
| ≥60 years                         | 0.56 (0.41-0.75)        | 10                              | 47.1                      | 0.049                      |
| Follow-up years                   |                         |                                 |                           |                            |
| <3 years                          | 0.33 (0.06-0.75)        | 2                               | 82.7                      | 0.02                       |
| ≥3 years                          | 0.53 (0.47-0.61)        | 32                              | 46.7                      | 0.002                      |
| Sample size                       |                         |                                 |                           |                            |
| <2000                             | 0.50 (0.42-0.59)        | 22                              | 41.3                      | 0.02                       |
| ≥2000                             | 0.53 (0.47-0.61)        | 12                              | 60.2                      | 0.004                      |
| Publication year                  |                         |                                 |                           |                            |
| <2010                             | 0.57 (0.45-0.71)        | 14                              | 43.6                      | 0.04                       |
| ≥2010                             | 0.52 (0.44-0.61)        | 20                              | 51.5                      | 0.001                      |
| Laboratory assays for adiponectin |                         |                                 |                           |                            |
| ELISA                             | 0.53 (0.45-0.63)        | 20                              | 56.2                      | 0.001                      |
| RIA                               | 0.47 (0.29-0.75)        | 5                               | 60.2                      | 0.04                       |
| Others                            | 0.60 (0.47-0.75)        | 9                               | 13.6                      | 0.32                       |

|                                  |                  |    |      |        |
|----------------------------------|------------------|----|------|--------|
| Study quality <sup>b</sup>       |                  |    |      |        |
| High (8-9)                       | 0.56 (0.48-0.66) | 24 | 44.1 | 0.01   |
| Low ( $\leq 7$ )                 | 0.47 (0.35-0.62) | 10 | 62.2 | 0.01   |
| Level of adjustment <sup>c</sup> |                  |    |      |        |
| Level 1                          | 0.40 (0.34-0.47) | 23 | 69.1 | <0.001 |
| Level 2                          | 0.39 (0.30-0.50) | 9  | 55.3 | 0.02   |
| Level 3                          | 0.53 (0.48-0.60) | 28 | 22.9 | 0.14   |
| Level 4                          | 0.63 (0.49-0.80) | 9  | 45.6 | 0.07   |

---

**Abbreviations:** RR, relative risk.

<sup>a</sup>The results are presented using the random-effects model.

<sup>b</sup>The study quality scored from 0 to 9, with higher score indicating higher quality.

<sup>c</sup>Level of adjustment was defined as below: level 1 was basic models without adjustment for metabolic biomarkers; level 2 was models adjusted for lipids and/or inflammatory markers; level 3 was models adjusted for either insulin sensitivity markers or glycaemia markers; level 4 was models adjusted for both insulin sensitivity markers and glycaemia markers.

**Supplemental Table S6.** The extracted data for the dose-response meta-analysis from 12 available studies

| First author (reference)      | Adiponectin category | Adiponectin median, µg/ml | Number of participants | Number of cases | RR (95% CI)      |
|-------------------------------|----------------------|---------------------------|------------------------|-----------------|------------------|
| Keonig <sup>1</sup>           | Tertile 1            | 3.81                      | 298                    | 57              | 1                |
|                               | Tertile 2            | 6.32                      | 294                    | 31              | 0.63 (0.40-0.99) |
|                               | Tertile 3            | 10.6                      | 295                    | 27              | 0.81 (0.50-1.33) |
| Snijder <sup>2</sup> (male)   | Quartile 1           | 8.3                       | 145                    | 18              | 1                |
|                               | Quartile 2           | 9.8                       | 151                    | 16              | 0.79 (0.38-1.67) |
|                               | Quartile 3           | 10.6                      | 143                    | 14              | 0.71 (0.33-1.55) |
|                               | Quartile 4           | 12.4                      | 145                    | 12              | 0.61 (0.27-1.40) |
| Snijder <sup>2</sup> (female) | Quartile 1           | 3.5                       | 170                    | 27              | 1                |
|                               | Quartile 2           | 7.2                       | 170                    | 14              | 0.58 (0.28-1.20) |
|                               | Quartile 3           | 8.2                       | 170                    | 11              | 0.47 (0.22-1.01) |
|                               | Quartile 4           | 15.8                      | 170                    | 6               | 0.27 (0.10-0.73) |
| Wannamathee <sup>3</sup>      | Tertile 1            | 2.7                       | 1189                   | 55              | 1                |
|                               | Tertile 2            | 5.4                       | 1189                   | 32              | 0.66 (0.42-1.04) |
|                               | Tertile 3            | 9.7                       | 1189                   | 18              | 0.40 (0.23-0.70) |
| Heidermann <sup>4</sup>       | Quintile 1           | 8.1                       | 775                    | 548             | 1                |
|                               | Quintile 2           | 13.9                      | 449                    | 221             | 0.46 (0.35-0.60) |
|                               | Quintile 3           | 17.9                      | 366                    | 139             | 0.31 (0.23-0.42) |
|                               | Quintile 4           | 21.7                      | 300                    | 73              | 0.21 (0.15-0.30) |
|                               | Quintile 5           | 28.4                      | 284                    | 57              | 0.17 (0.12-0.25) |
| Thorand <sup>5</sup>          | Tertile 1            | 8.3                       | 709                    | 236             | 1                |
|                               | Tertile 2            | 11.5                      | 646                    | 148             | 0.53 (0.37-0.76) |
|                               | Tertile 3            | 15.7                      | 579                    | 76              | 0.38 (0.27-0.53) |
| Kizer <sup>6a</sup>           | Quartile 1           | 7.2                       | 950                    | 146             | 1                |

|                             |            |      |      |     |                  |
|-----------------------------|------------|------|------|-----|------------------|
|                             | Quartile 2 | 10.8 | 950  | 73  | 0.74 (0.55-1.01) |
|                             | Quartile 3 | 15.0 | 951  | 49  | 0.66 (0.46-0.96) |
|                             | Quartile 4 | 23.6 | 951  | 41  | 0.79 (0.50-1.23) |
| Li <sup>7</sup>             | Quintile 1 | 4.3  | 964  | 86  | 1                |
|                             | Quintile 2 | 6.3  | 697  | 33  | 0.58 (0.39-0.87) |
|                             | Quintile 3 | 7.9  | 487  | 15  | 0.41 (0.24-0.72) |
|                             | Quintile 4 | 10   | 431  | 10  | 0.34 (0.18-0.68) |
|                             | Quintile 5 | 13.9 | 429  | 20  | 0.72 (0.42-1.25) |
| Lilja <sup>8</sup> (male)   | Quartile 1 | 3.1  | 388  | 195 | 1                |
|                             | Quartile 2 | 7.5  | 294  | 101 | 0.83 (0.62-1.12) |
|                             | Quartile 3 | 10.5 | 224  | 31  | 0.40 (0.25-0.64) |
|                             | Quartile 4 | 15.2 | 235  | 43  | 0.52 (0.34-0.81) |
| Lilja <sup>8</sup> (female) | Quartile 1 | 4.6  | 346  | 149 | 1                |
|                             | Quartile 2 | 11.6 | 274  | 76  | 0.70 (0.50-0.98) |
|                             | Quartile 3 | 16.2 | 218  | 21  | 0.38 (0.22-0.64) |
|                             | Quartile 4 | 23   | 218  | 21  | 0.44 (0.25-0.76) |
| Yamamoto <sup>9</sup>       | Quartile 1 | 2.6  | 1145 | 76  | 1                |
|                             | Quartile 2 | 6    | 1138 | 60  | 0.79 (0.55-1.12) |
|                             | Quartile 3 | 8.2  | 1174 | 47  | 0.60 (0.41-0.88) |
|                             | Quartile 4 | 11.8 | 1134 | 31  | 0.40 (0.25-0.64) |
| Marques-Vidal <sup>10</sup> | Quartile 1 | 3.7  | 913  | 71  | 1                |
|                             | Quartile 2 | 7.3  | 969  | 58  | 0.97 (0.64-1.47) |
|                             | Quartile 3 | 11.3 | 969  | 48  | 0.84 (0.55-1.30) |
|                             | Quartile 4 | 17.3 | 991  | 31  | 0.64 (0.40-1.03) |
| Neville <sup>11a</sup>      | Tertile 1  | 1.9  | 467  | 73  | 1                |
|                             | Tertile 2  | 5.2  | 467  | 51  | 0.92 (0.60-1.43) |

|               |            |      |     |     |                  |
|---------------|------------|------|-----|-----|------------------|
|               | Tertile 3  | 8.6  | 463 | 27  | 0.54 (0.29-0.99) |
| Current study | Quartile 1 | 5.3  | 420 | 275 | 1                |
|               | Quartile 2 | 7.5  | 305 | 161 | 0.65 (0.37-1.15) |
|               | Quartile 3 | 9.4  | 234 | 91  | 0.62 (0.34-1.14) |
|               | Quartile 4 | 12.8 | 183 | 44  | 0.33 (0.15-0.73) |

---

**Abbreviations:** RR, relative risk.

<sup>a</sup>Numbers of cases were estimated from the incidence rates for type 2 diabetes reported in the studies.

**Supplemental Figure S1.** Flowchart of the Singapore Chinese Health Study

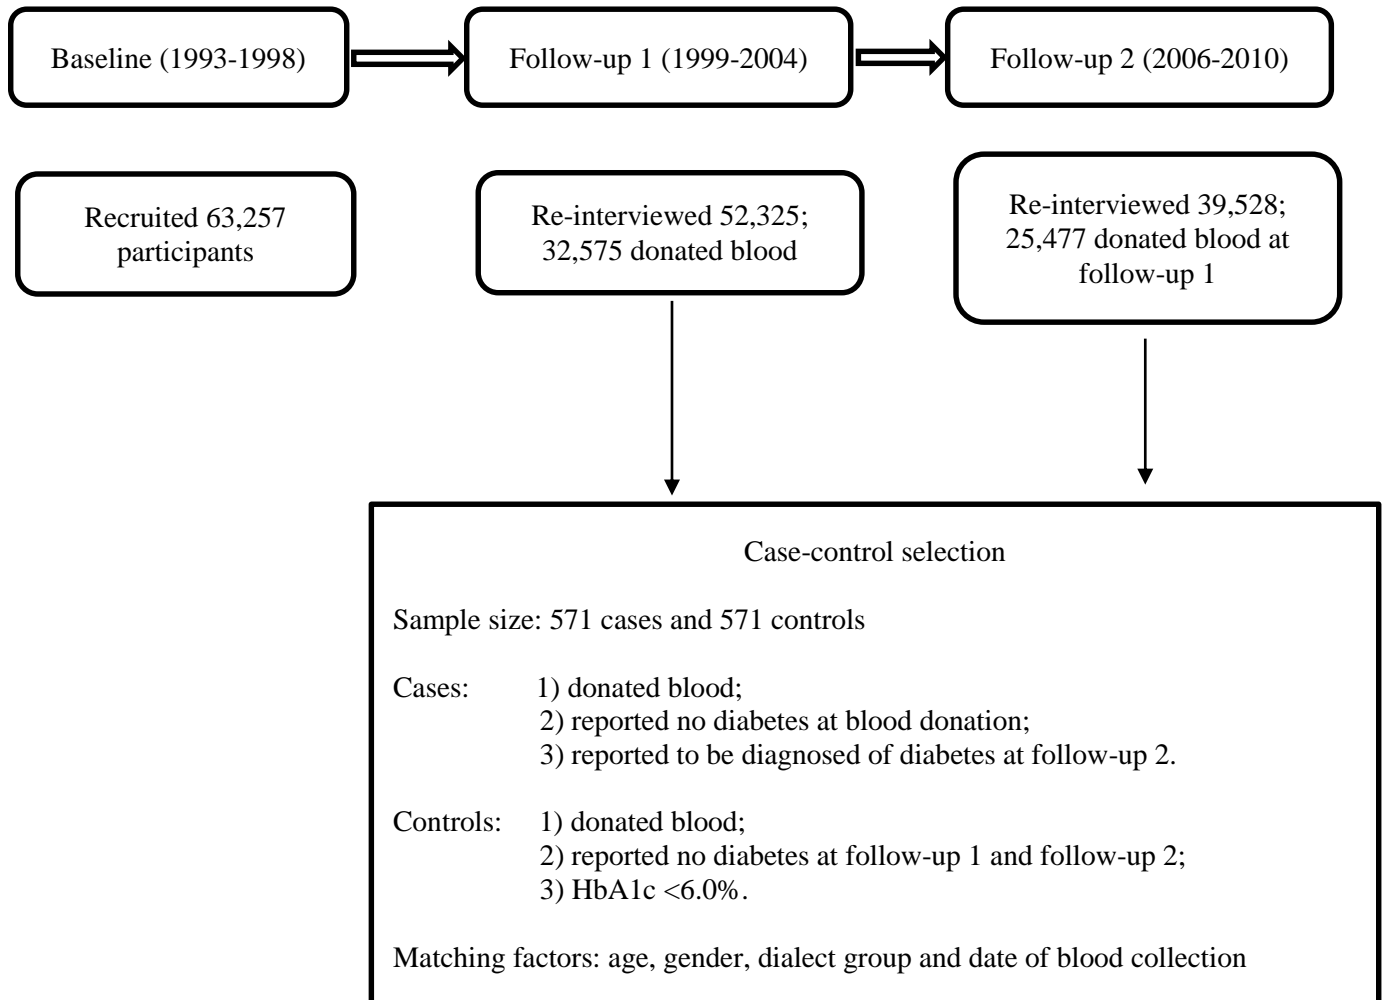

**Supplemental Figure S2.** Flowchart of the meta-analysis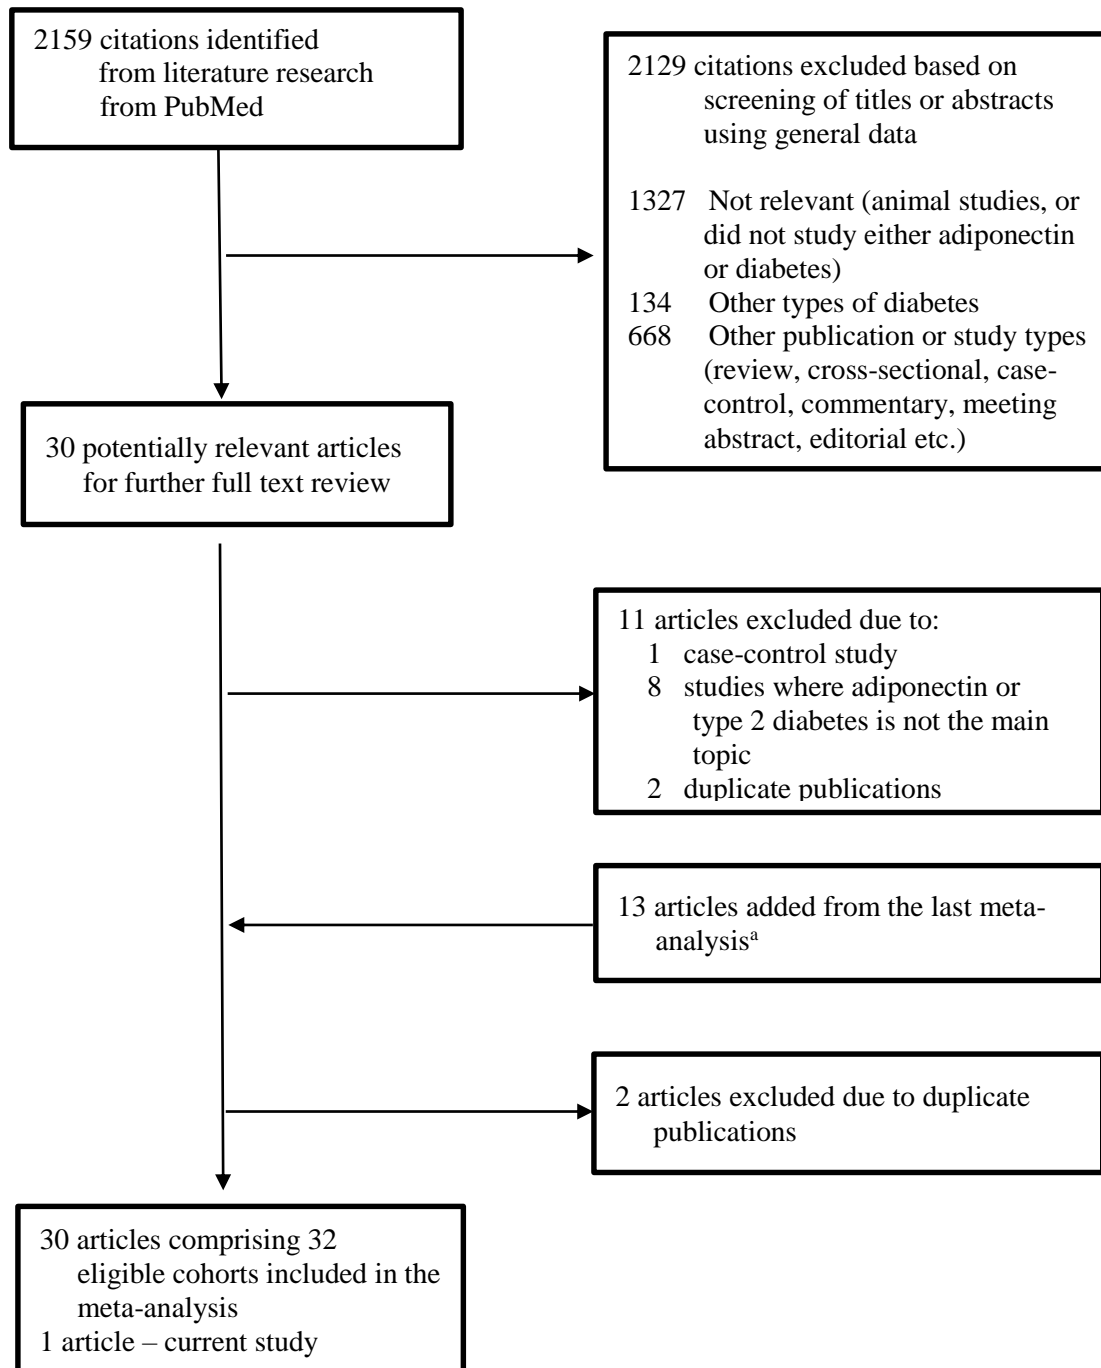**Figure legend**

<sup>a</sup>The last meta-analysis referred to Li et al.

Li, S., Shin, H. J., Ding, E. L. & van Dam, R. M. Adiponectin levels and risk of type 2 diabetes: a systematic review and meta-analysis. *JAMA*. **302**, 179-188 (2009).



## REFERENCES

- 1 Koenig, W., Khuseyinova, N., Baumert, J., Meisinger, C. & Lowel, H. Serum concentrations of adiponectin and risk of type 2 diabetes mellitus and coronary heart disease in apparently healthy middle-aged men: results from the 18-year follow-up of a large cohort from southern Germany. *J Am Coll Cardiol.* **48**, 1369-1377 (2006).
- 2 Snijder, M. B. *et al.* Associations of adiponectin levels with incident impaired glucose metabolism and type 2 diabetes in older men and women: the hoorn study. *Diabetes Care.* **29**, 2498-2503 (2006).
- 3 Wannamethee, S. G. *et al.* Adipokines and risk of type 2 diabetes in older men. *Diabetes Care.* **30**, 1200-1205 (2007).
- 4 Heidemann, C. *et al.* Total and high-molecular-weight adiponectin and resistin in relation to the risk for type 2 diabetes in women. *Ann Intern Med.* **149**, 307-316 (2008).
- 5 Thorand, B. *et al.* Associations between leptin and the leptin / adiponectin ratio and incident Type 2 diabetes in middle-aged men and women: results from the MONICA / KORA Augsburg study 1984-2002. *Diabet Med.* **27**, 1004-1011 (2010).
- 6 Kizer, J. R. *et al.* Total and high-molecular-weight adiponectin and risk of incident diabetes in older people. *Diabetes Care.* **35**, 415-423 (2012).
- 7 Li, Y., Yatsuya, H., Iso, H., Toyoshima, H. & Tamakoshi, K. Inverse relationship of serum adiponectin concentration with type 2 diabetes mellitus incidence in middle-aged Japanese workers: six-year follow-up. *Diabetes Metab Res Rev.* **28**, 349-356 (2012).
- 8 Lilja, M., Rolandsson, O., Norberg, M. & Soderberg, S. The impact of leptin and adiponectin on incident type 2 diabetes is modified by sex and insulin resistance. *Metab Syndr Relat Disord.* **10**, 143-151 (2012).
- 9 Yamamoto, S. *et al.* Circulating adiponectin levels and risk of type 2 diabetes in the Japanese. *Nutr Diabetes.* **4**, e130 (2014).

- 10 Marques-Vidal, P. *et al.* Adipocytokines, hepatic and inflammatory biomarkers and incidence of type 2 diabetes. the CoLaus study. *PLoS One.* **7**, e51768 (2012).
- 11 Neville, C. E. *et al.* The relationship between adipokines and the onset of type 2 diabetes in middle-aged men: The PRIME study. *Diabetes Res Clin Pract.* **120**, 24-30 (2016).
